# Supplementary material for: The Targeting of RNA Polymerase I Transcription Using CX-5461 in Combination with Radiation Enhances Tumour Cell Killing Effects in Human Solid Cancers
Source: PubMed Central journal article supplement (PMC6826960; doi:10.3390/cancers11101429), 2019-09-25
Supplement: cancers-11-01429-s001.pdf [file cancers-11-01429-s001.pdf]

# The Targeting of RNA Polymerase I Transcription Using CX-5461 in Combination with Radiation Enhances Tumor Cell Killing Effects in Human Solid Cancers

Mohammed Ismael, Roger Webb, Mazhar Ajaz, Karen J. Kirkby and Helen M. Coley

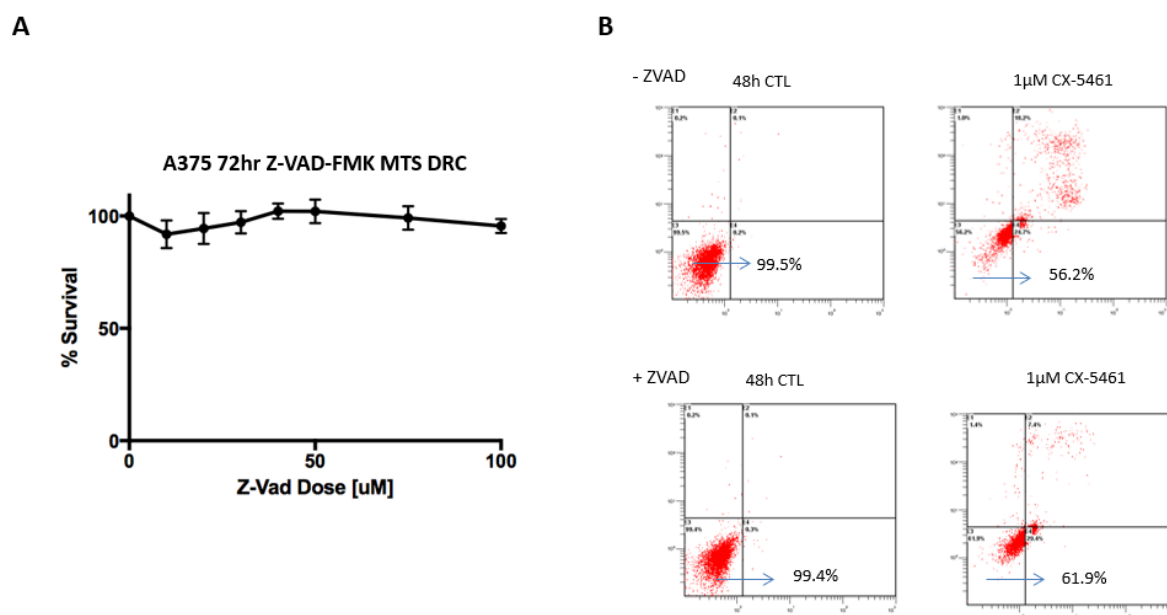

**Figure S1.** Annexin/PI assay involving exposure of A375 cells to CX-5461 in combination with Z-VAD. (A) MTS dose response assay of A375 cells treated with increasing concentrations of Z-VAD-FMK caspase inhibitor to assess non-toxic tolerable doses. A dose of 50  $\mu$ M Z-VAD was selected for use. (B) Annexin V-FITC/PI assay of A375 cells treated with CX-5461 for 48 h with or without Z-VAD-FMK; the percentage viable population of cells (i.e., PI and Annexin negative) are indicated in the bottom left hand quadrant of each panel cytogram. In Z-VAD untreated A375 cells challenged with a lethal dose of 1  $\mu$ M CX-5461, an apoptotic population (at mid-late phase) is indicated in the top right-hand quadrant. The bottom left hand quadrant also migrates to a more PI positive population. In the presence of Z-VAD treatment with the same dose of CX-5461 the apoptotic (caspase-dependent) population is not present, as expected. However, the PI migration of the control population remains the same indicating that any changes present are not due to a caspase-dependent cell death population and are more indicative of non-caspase dependent programmed cell death.

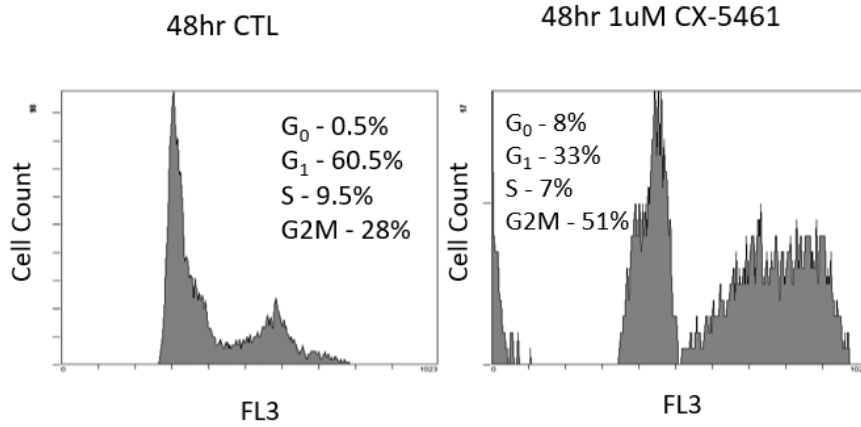

**Figure S2.** Cell cycle analysis of A375 cells exposed to CX-5461 and table of cell line culture medium. Cell cycle analysis of A375 cells exposed to 1  $\mu$ M CX-5461 for 48 h. A375 cells challenged with CX-5461 showed a significant increase in G2M blockade compared to untreated control.

CaSki vs CX-5461 24hr, 28hr & 72hr Western blots

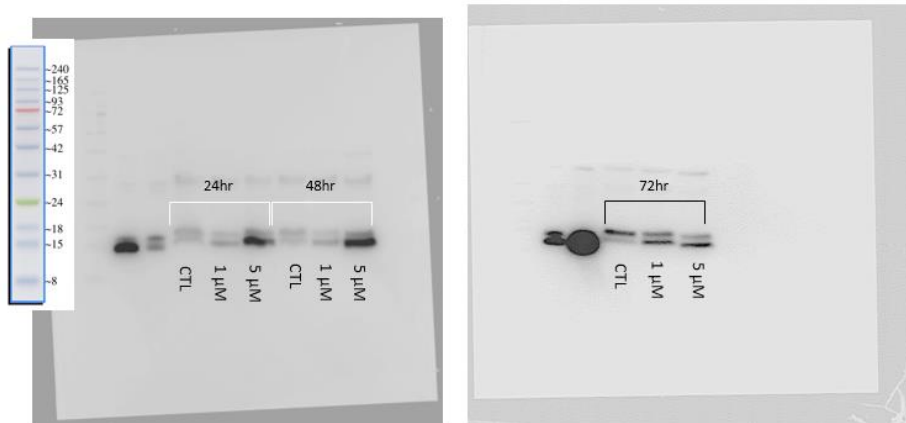

pH2AX CaSki 48hr and 72hr CX-5461 western

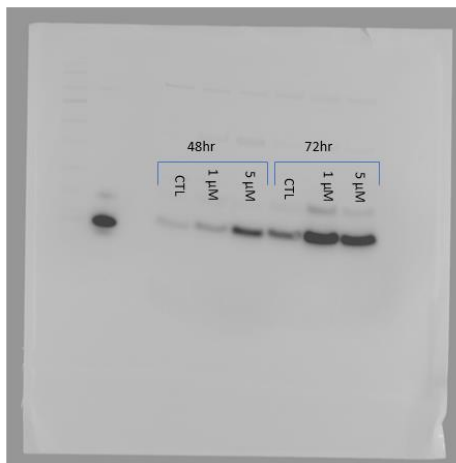

pH2AX CaSki 48hr and 72hr CX-5461 densitometry

|         | 48hr   |           |           | 72hr   |           |           |
|---------|--------|-----------|-----------|--------|-----------|-----------|
|         | CTL    | 1 $\mu$ M | 5 $\mu$ M | CTL    | 1 $\mu$ M | 5 $\mu$ M |
| Density | 3.7009 | 10.1231   | 21.6432   | 3.9803 | 41.9519   | 37.0883   |
| Ratio   | 1      | 2.7353    | 5.8481    | 1      | 10.5397   | 9.3178    |

pH2AX CaSki CX-5461 & X-rays 72hr western

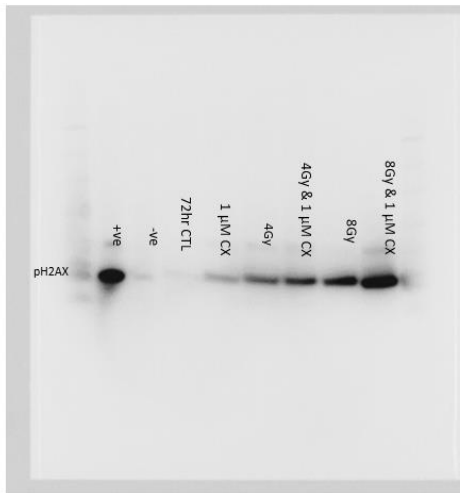

CaSki CX-5461 & X-rays 72hr Densitometry

|     |          | 72hr     |           |          |           |         |
|-----|----------|----------|-----------|----------|-----------|---------|
| CTL | 1μM      | 4Gy      | 4Gy 1μM   | 8Gy      | 8Gy 1μM   |         |
|     | 8.9012   | 23.8431  | 39.0811   | 48.6552  | 47.122    | 63.1885 |
| 1   | 2.678639 | 4.390543 | 5.4661394 | 5.293893 | 7.0988743 |         |

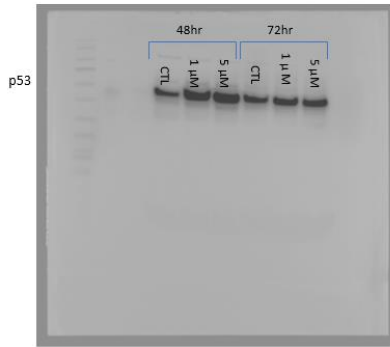

|         |         | CaSki p53 |          |         |          |          |  |
|---------|---------|-----------|----------|---------|----------|----------|--|
|         |         | 48hr      |          |         | 72hr     |          |  |
|         | CTL     | 1μM       | 5μM      | CTL     | 1μM      | 5μM      |  |
| Density | 48.6468 | 61.1155   | 63.5744  | 47.3641 | 48.1862  | 53.2072  |  |
| Ratio   | 1       | 1.256311  | 1.306857 | 1       | 1.017357 | 1.123366 |  |

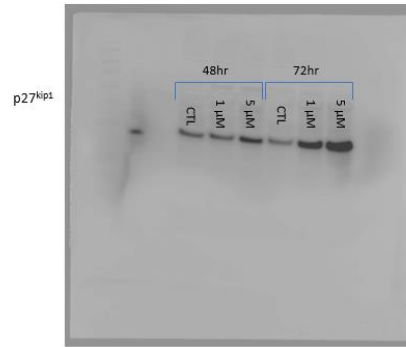

|         |         | CaSki p27 |          |         |          |          |  |
|---------|---------|-----------|----------|---------|----------|----------|--|
|         |         | 48hr      |          |         | 72hr     |          |  |
|         | CTL     | 1μM       | 5μM      | CTL     | 1μM      | 5μM      |  |
| Density | 35.8762 | 37.5821   | 46.7524  | 31.8513 | 52.7548  | 63.206   |  |
| Ratio   | 1       | 1.04755   | 1.303159 | 1       | 1.656284 | 1.984409 |  |

Figure S3. Detailed information of western blot analysis.

Table S1. CaSki LC3 western band intensity ratios.

| 24 h                 | Control  | 1 μM        | 5 μM        |
|----------------------|----------|-------------|-------------|
| LC3 I Density        | 31.7675  | 23.9522     | 52.1721     |
| LC3 II Density       | 25.9039  | 38.8133     | 85.4466     |
| LC3 II:I Ratio       | 1        | 0.753984    | 1.642311    |
|                      | 0.615421 | 1.221793    | 2.689749    |
| II:I Intensity ratio | 1        | 2.633074767 | 2.661239993 |
| 48 h                 | Control  | 1 μM        | 5 μM        |
| LC3 I Density        | 20.7186  | 17.583      | 51.1265     |
| LC3 II Density       | 23.0428  | 27.3585     | 92.6294     |
| LC3 II:I Ratio       | 1        | 0.848658    | 2.467662    |
|                      | 0.500000 | 1.555962473 | 1.811768792 |
| II:I Intensity ratio | 1        | 3.111924946 | 3.623539584 |

| 72 h                 | Control  | 1 $\mu$ M   | 5 $\mu$ M   |
|----------------------|----------|-------------|-------------|
| LC3 I Density        | 68.4752  | 63.8067     | 51.2878     |
| LC3 II Density       | 55.8014  | 75.6569     | 68.9298     |
| LC3 II:I Ratio       | 1        | 0.931822    | 0.748998    |
|                      | 0.514914 | 1.509766036 | 1.343980892 |
| II:I Intensity ratio | 1        | 2.932074164 | 2.610107498 |

**Table S2.** List of solid cancer cell lines used for development of panel exposed to CX-5461.

| Cell Line Culture Medium & Tissue Type Supplements |                                                             |
|----------------------------------------------------|-------------------------------------------------------------|
| CaSki                                              | RPMI 1640 10% FBS-Epidermoid carcinoma of the cervix        |
| A375                                               | DMEM 10% FBS-Malignant melanoma of the skin                 |
| LN18                                               | DMEM 5% FBS-Glioblastoma of the brain – right temporal lobe |
| SKMEL-28                                           | RPMI 1640 10% FBS-Malignant melanoma of the skin            |
| HCT-116                                            | McCoy's A 10% FBS-Colorectal carcinoma of the colon         |
| G361                                               | McCoy's A 10% FBS-Malignant melanoma of the skin            |
| Panc-1                                             | DMEM 10% FBS-Epithelial carcinoma of the pancreas           |
| SCaBR                                              | EMEM 10% FBS-Squamous cell carcinoma of the bladder         |
| A549                                               | F-12K 10% FBS-Epithelial carcinoma of the lung              |
| BXPC3                                              | RPMI 1640 10% FBS-Adenocarcinoma of the pancreas            |
| PSN-1                                              | RPMI 1640 10% FBS-Adenocarcinoma of the pancreas            |
| PEO1                                               | RPMI 1640 10% FBS-Adenocarcinoma of the ovary               |
| PEO1 CarbR                                         | RPMI 1640 10% FBS-Adenocarcinoma of the ovary               |
| SiHa                                               | EMEM 10% FBS-Squamous cell carcinoma of the cervix          |

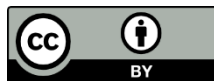

© 2019 by the authors. Submitted for possible open access publication under the terms and conditions of the Creative Commons Attribution (CC BY) license (<http://creativecommons.org/licenses/by/4.0/>).
